# Supplementary material
Source: Royal Society of Chemistry journal article supplement (doi:10.1039/d5ya00340g)
Supplement: d5ya00340g1.pdf [file d5ya00340g1.pdf]

## Supplementary Information (SI)

### ➤ XRD

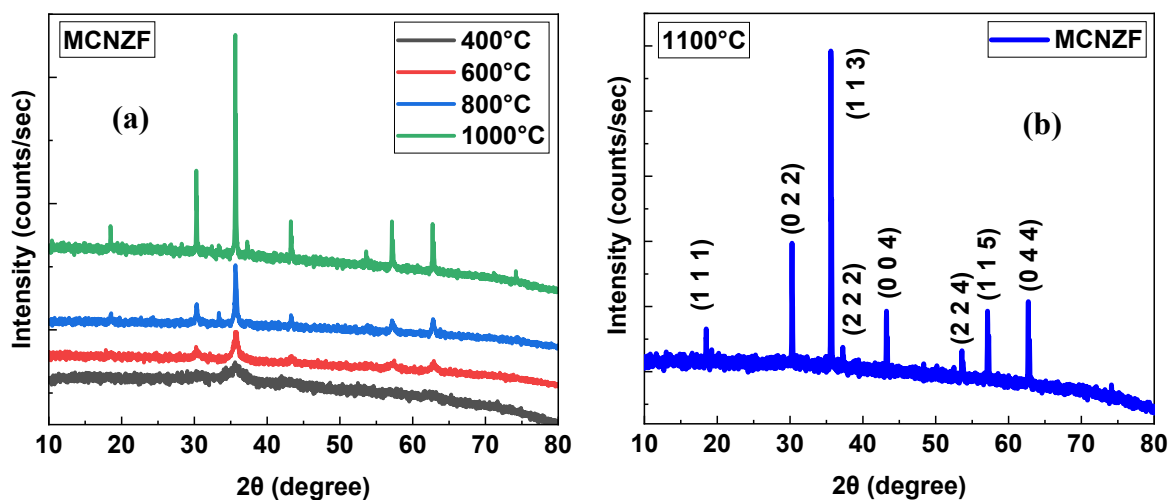

Figure S1 (a) XRD of MCNZF calcined at various temperatures (b) XRD of MCNZF calcined at 1100°C

### ➤ Table S1: Rietveld Refinement Parameters

|                                             |                 |
|---------------------------------------------|-----------------|
| <b>Crystal Structure</b>                    | <b>Cubic</b>    |
| <b>Space group</b>                          | <b>F d -3 m</b> |
| <b>Cell Parameters</b>                      |                 |
| <b>a=b=c</b>                                | <b>8.4086</b>   |
| <b><math>\alpha = \beta = \gamma</math></b> | <b>90</b>       |
| <b>Volume(A<sup>3</sup>)</b>                | <b>594.5168</b> |
| <b>Density(g/cm<sup>3</sup>)</b>            | <b>26.229</b>   |
| <b>Site Occupation</b>                      |                 |
| <b>O1</b>                                   | <b>1</b>        |
| <b>FE1</b>                                  | <b>1</b>        |
| <b>FE2</b>                                  | <b>1</b>        |
| <b>MN1</b>                                  | <b>0.4</b>      |
| <b>CO1</b>                                  | <b>1</b>        |
| <b>NI1</b>                                  | <b>1</b>        |
| <b>ZN1</b>                                  | <b>0.4</b>      |
| <b>Agreement Factors</b>                    |                 |
| <b>R<sub>p</sub></b>                        | <b>37</b>       |
| <b>R<sub>wp</sub></b>                       | <b>21.2</b>     |
| <b>R<sub>e</sub></b>                        | <b>19.1</b>     |
| <b>Chi<sup>2</sup></b>                      | <b>1.232</b>    |

➤ **Presence of residual carbon**

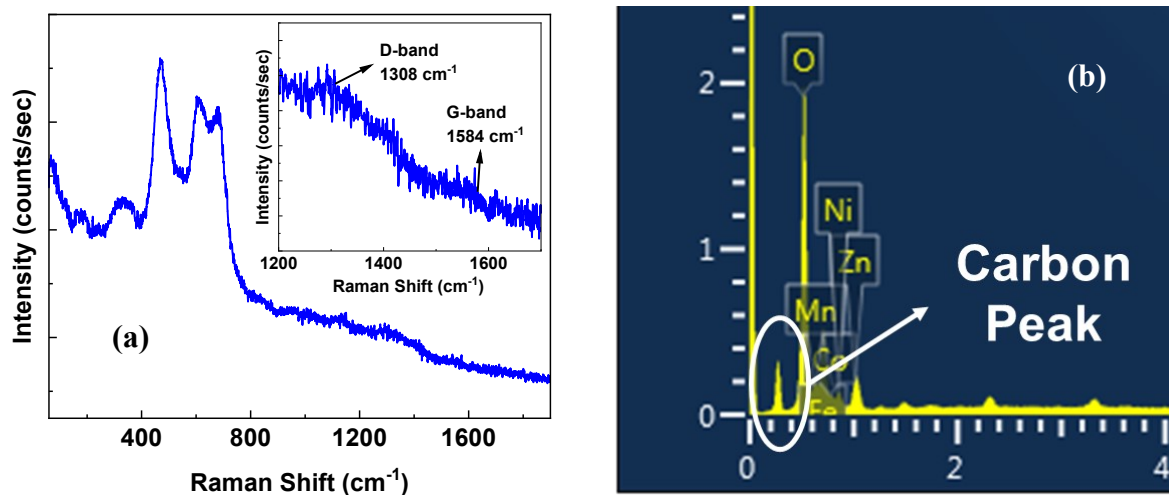

➤ **UV-Visible spectroscopy**

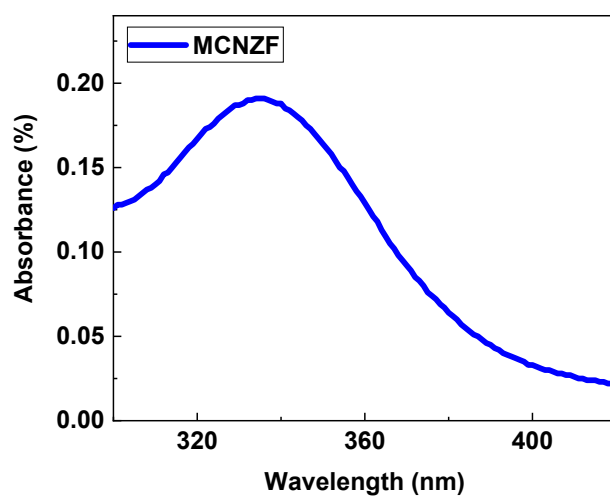

Figure S3. UV of MCNZF

➤ FESEM Images at various magnifications

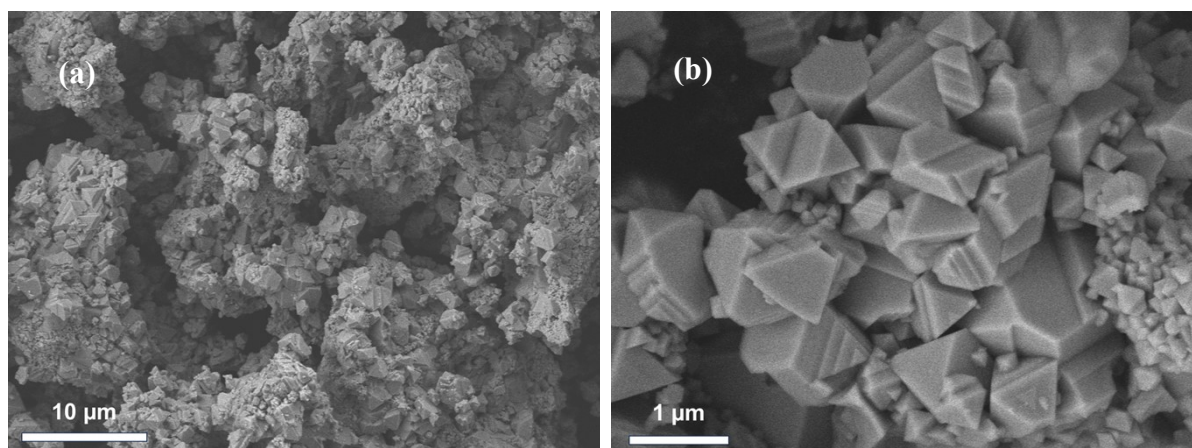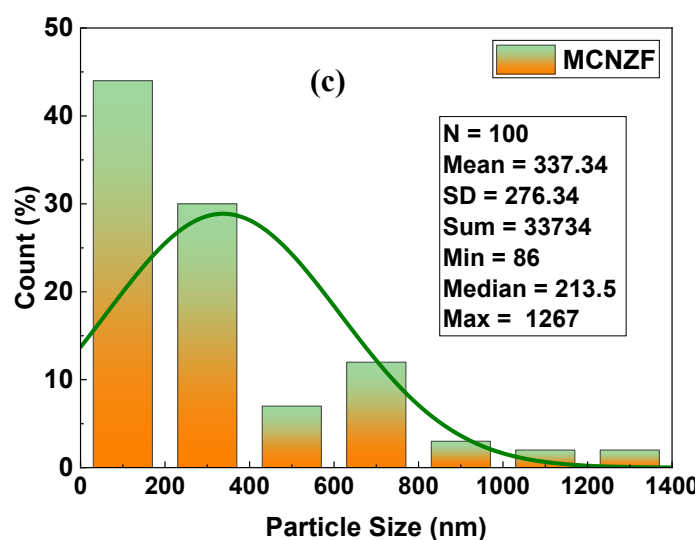

Figure S4 (a) FESEM image at 10 μm (b) FESEM image at 1 μm (c) Particle size distribution

➤ Electrochemical Analysis

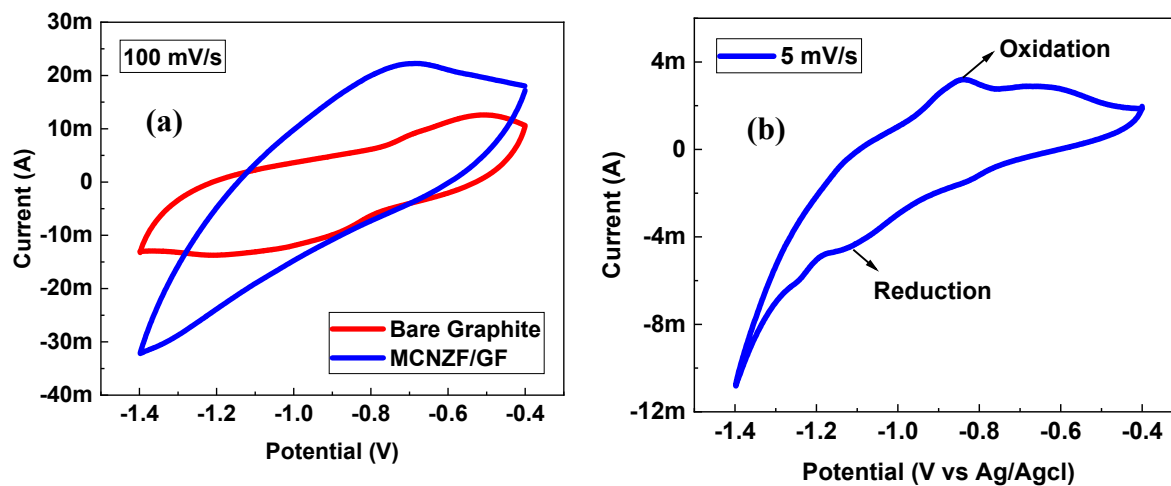

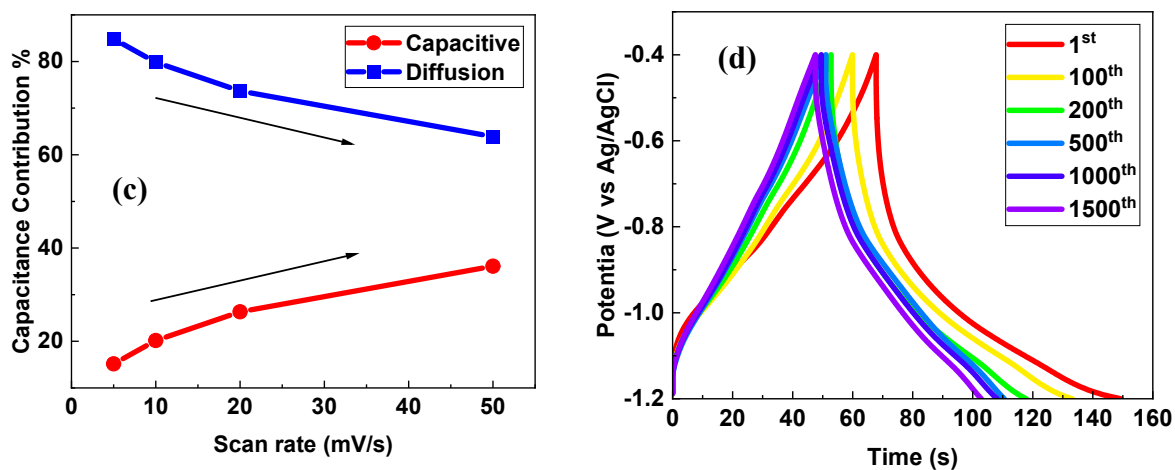

Figure S5 (a) CV of Bare Graphite and MCNZF/GF at 100 mV/s (b) CV of MCNZF/GF at 5 mV/s (c) Variation of capacitance contribution (%) w.r.t scan rate (d) GCD of various cycles number

### ➤ EIS Analysis

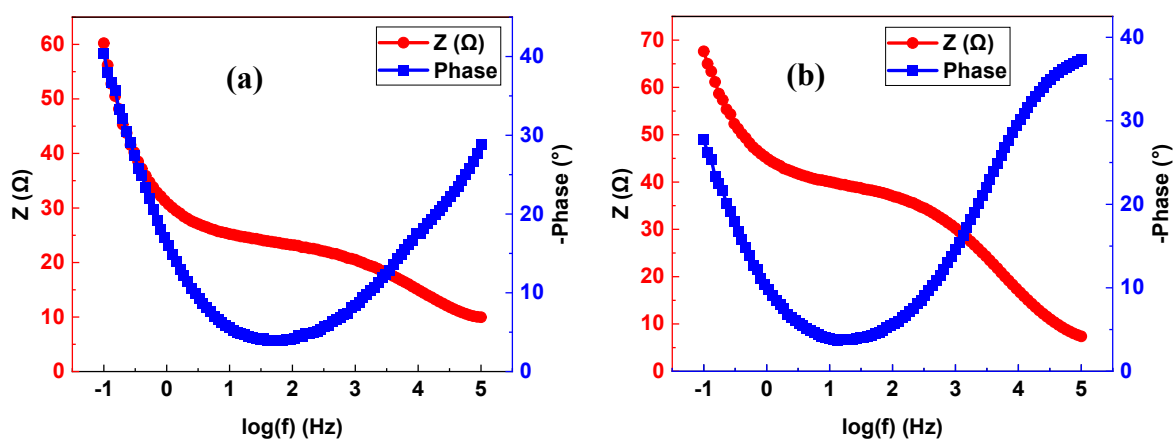

Figure S6 (a) Bode plot of MCNZF/GF before GCD (b) Bode plot of MCNZF/GF after GCD

### ➤ Table S2: EIS Parameters

| Parameters                    | Before GCD | After GCD |
|-------------------------------|------------|-----------|
| $R_0$ ( $\Omega$ )            | 1.0653E-13 | 1.0817    |
| $R_1$ ( $\Omega$ )            | 24.906     | 38.748    |
| $R_2$ ( $\Omega$ )            | 1.869E09   | 4.895E09  |
| $CPE_1$ (Mho*s <sup>N</sup> ) | 0.030729   | 0.035141  |
| $N_1$                         | 0.66703    | 0.63303   |
| $CPE_2$ (Mho*s <sup>N</sup> ) | 0.00025064 | 9.376E-05 |
| $N_2$                         | 0.43255    | 0.55142   |

➤ **Formulae used:**

- Tauc's relation correlates the absorption coefficient ( $\alpha$ ) and the incident photon energy ( $h\nu$ ). The equation is:

$$(\alpha h\nu)^n = A(h\nu - E_G) \quad (E1)$$

Where,  $A$  is a constant,  $E_G$  is the optical band gap, and  $n$  depends on the type of electronic transition ( $n = 1/2$  for indirect and  $n = 2$  for direct transitions).

- The Specific capacitance ( $C_{sp}$ ), for three electrode system was calculated from GCD studies from the following equations.

$$C_{sp} = \frac{I \times \Delta t}{m \times \Delta V} \quad (E2)$$

Where,  $I$  represent the response of current (A),  $m$  denotes the mass of the active electrode material (g),  $\Delta t$  represents the discharge time (s),  $\Delta V$  represents the potential window (V).

- The capacitance retention (%) reflects the ability of a material to preserve its specific capacitance ( $C_{sp}$ ) during repeated charge-discharge cycling. Capacitance retention was calculated using the formula:

$$\text{Capacitance retention (\%)} = \left( \frac{C_f}{C_i} \right) \times 100 \quad (E3)$$

Where,  $C_f$  is the capacitance measured after a specified number of cycles.  $C_i$  is the initial capacitance measured at the beginning of the experiment.

- Energy density (E) was measured from GCD in the two-electrode system.

$$E = \frac{I}{2 \times 3.6} \Delta C_{sp} (\Delta V)^2 \quad (E4)$$

- Power density (P) was measured from GCD in the two-electrode system.

$$P = \frac{E \times 3600}{\Delta t} \quad (E5)$$

Where,  $I$  denote the current (A) response,  $m$  denotes the active electrode material mass (g),  $\Delta t$  denotes the discharging time (s),  $\Delta V$  denotes the potential window (V), Energy density (E) units are Wh/kg and units of power density (P) in W/kg.
